# Supplementary material
Source: PubMed Central journal article supplement (PMC5976508)
Supplement: NIHMS920418-supplement-supplement_1.pdf [file NIHMS920418-supplement-supplement_1.pdf]

## Supplementary Information

### Early Treatment of SIV+ macaques with an $\alpha_4\beta_7$ mAb alters virus distribution and preserves CD4<sup>+</sup> T cells in later stages of infection

Philip J. Santangelo Ph.D<sup>1#\*</sup>, Claudia Cicala Ph.D<sup>2#</sup>, Siddappa N. Byrareddy Ph.D<sup>3,4#</sup>, Kristina Ortiz Ph.D<sup>2</sup>, Dawn Little Ph.D<sup>2</sup>, Kevin E. Lindsay B.S<sup>1</sup>, Sanjeev Gumber Ph.D<sup>5</sup>, J. J. Hong Ph.D<sup>5</sup>, Katija Jelacic Ph.D<sup>2</sup>, Kenneth A. Rogers Ph.D<sup>6</sup>, Chiara Zurla Ph.D<sup>1</sup>, Francois Villinger Ph.D<sup>6</sup>, Aftab A. Ansari Ph.D<sup>3</sup>, Anthony S. Fauci MD<sup>2</sup>, and James Arthos Ph.D<sup>2\*</sup>

<sup>1</sup>Walter H. Coulter Department of Biomedical Engineering, Georgia Institute of Technology and Emory University, 313, Ferst Drive Atlanta, GA 30680.

<sup>2</sup>Laboratory of Immunoregulation, National Institutes of Allergy & Infectious Diseases, National Institutes of Health, Bethesda, MD 20814.

<sup>3</sup>Department of Pathology, Emory University School of Medicine, Atlanta, GA 30322.

<sup>4</sup>Department of Pharmacology and Experimental Neuroscience, Omaha, NE 68198

<sup>5</sup>Division of Microbiology & Immunology, The Yerkes National Primate Research Center, Emory University, Atlanta, GA 30322.

<sup>6</sup>New Iberia Research Center, University of Louisiana Lafayette, Lafayette, LA, 70560.

The authors declare no conflict of interest.

**Acknowledgments:** The authors are grateful to the veterinary staff of the Yerkes National Primate Research Center of Emory University specially Ms. Stephanie Ehnert and her supporting staff members for coordinating all the nonhuman primate work. In addition, the authors are grateful to Dr. D. M. Schuster and the technical staff of the Department of Imaging Sciences and Radiology of Emory University Hospital, Emory University School of Medicine for their help and guidance for the imaging studies. The authors also would like to thank Dr. James Hoxie for the provision of the 7D3 hybridoma, Dr. K. Reimann and Mr. Adam Busby for the provision of primatized  $\alpha_4\beta_7$  mAb, the normal recombinant rhesus IgG and the anti-CD4 (Fab)<sub>2</sub>. We are also grateful to E. Husband and his colleagues at the Emory hospital imaging facility for scanning the animals, Drs. S. Jean, J. Wood, F Connor-Stroud and the Yerkes Veterinary and animal care team for their support of these studies. Finally, we are grateful to Alia Sanjani for editorial assistance.

Keywords: HIV, PET/CT Imaging, Integrin  $\alpha_4\beta_7$

## Supplementary Figure 1

Acute Cohort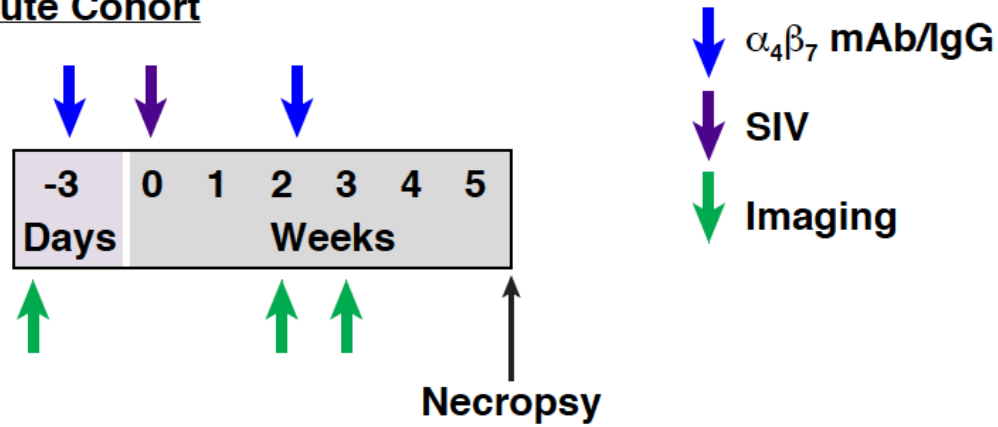Early-chronic Cohort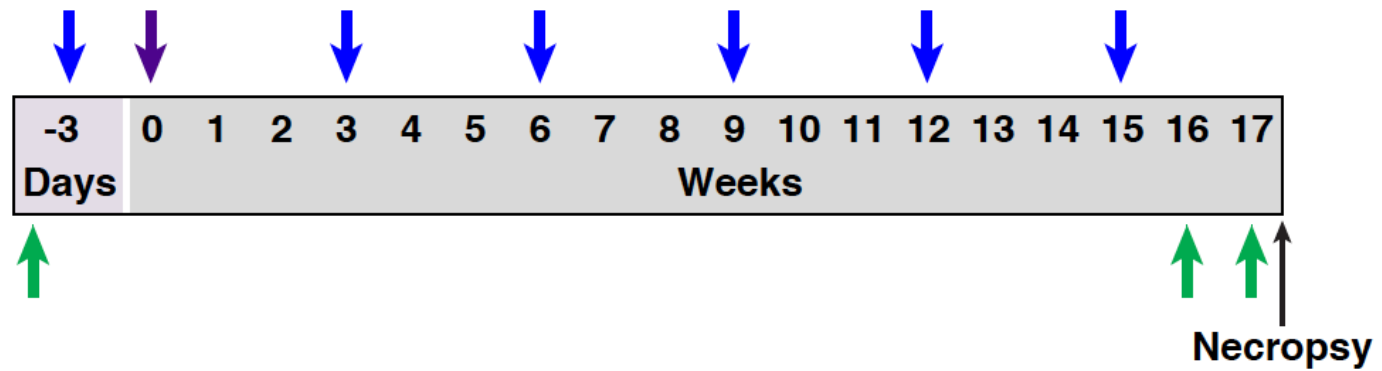Dual-therapy Cohort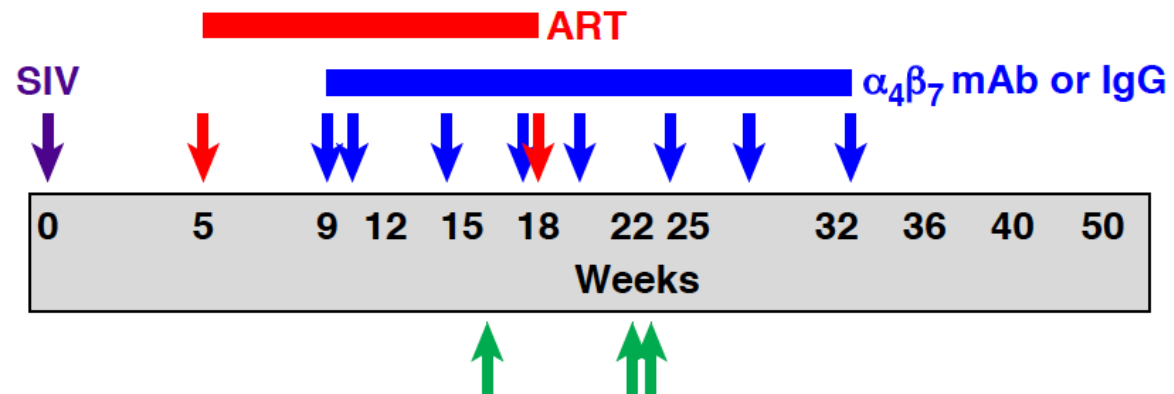

# Supplementary Figure 2

CT

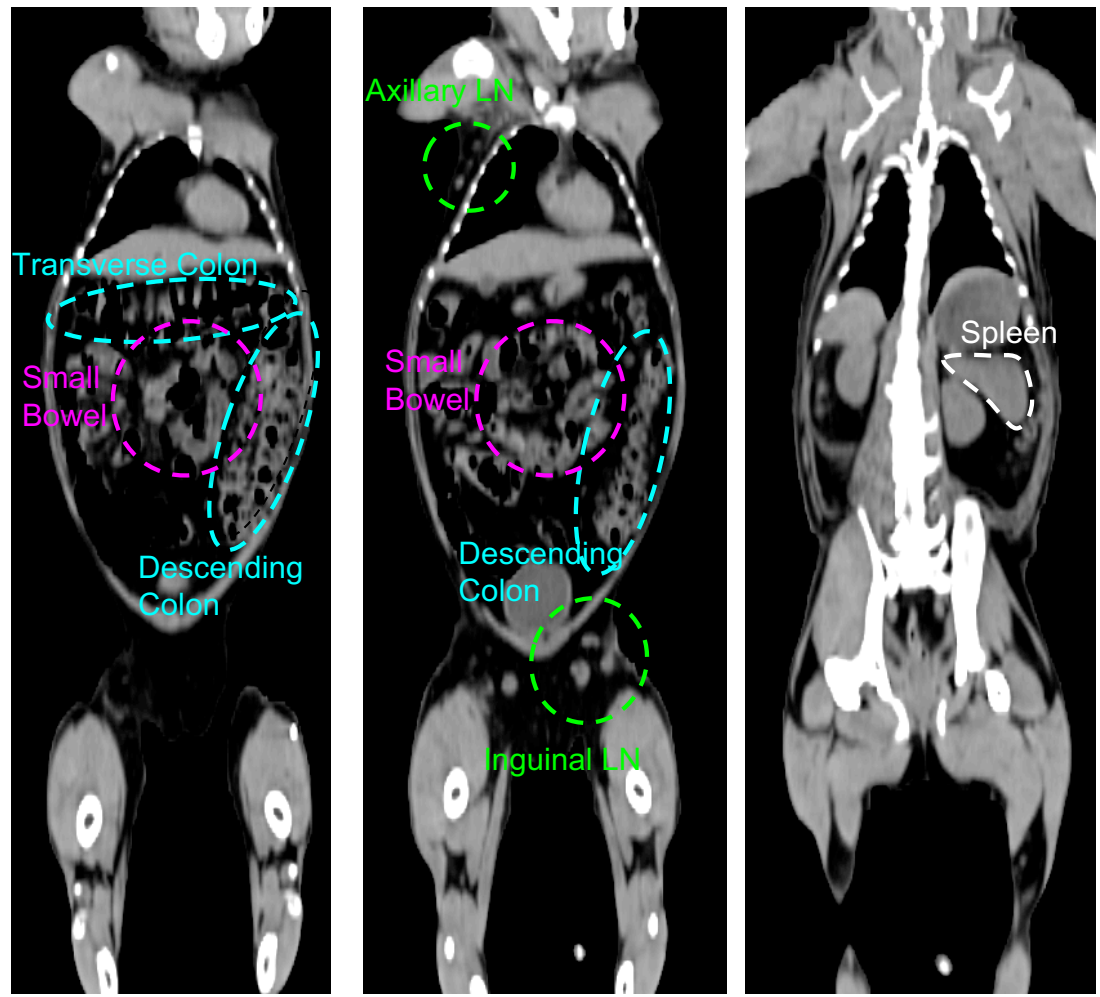

PET/CT fusion

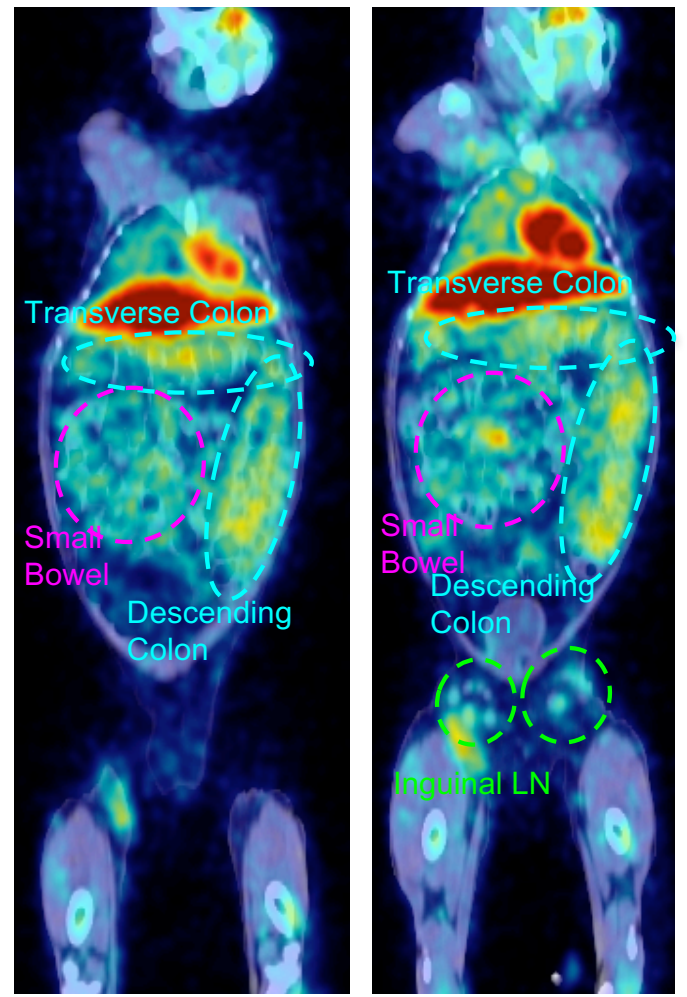

### Supplementary Figure 3

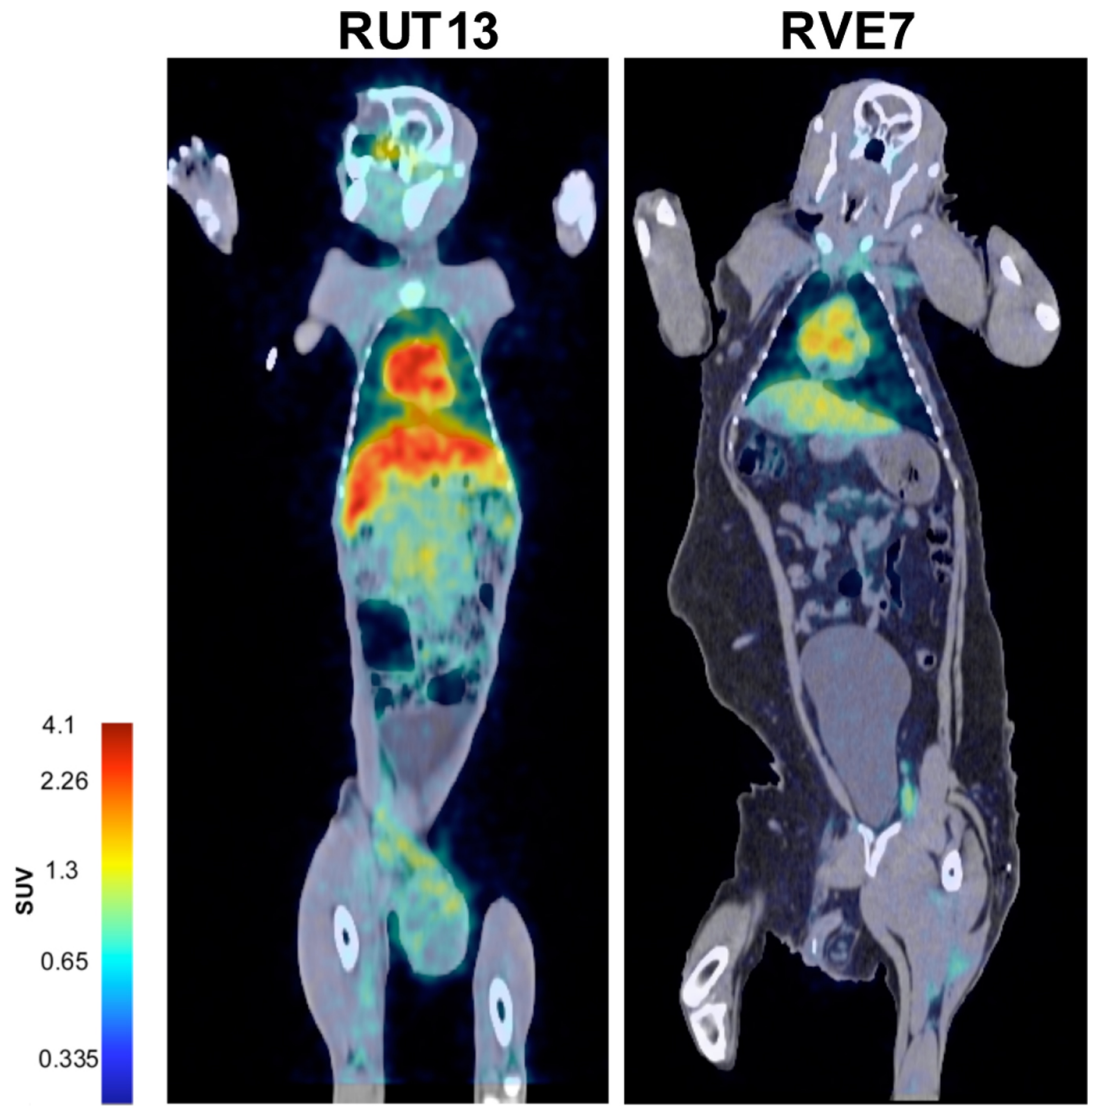

# Supplementary Figure 4

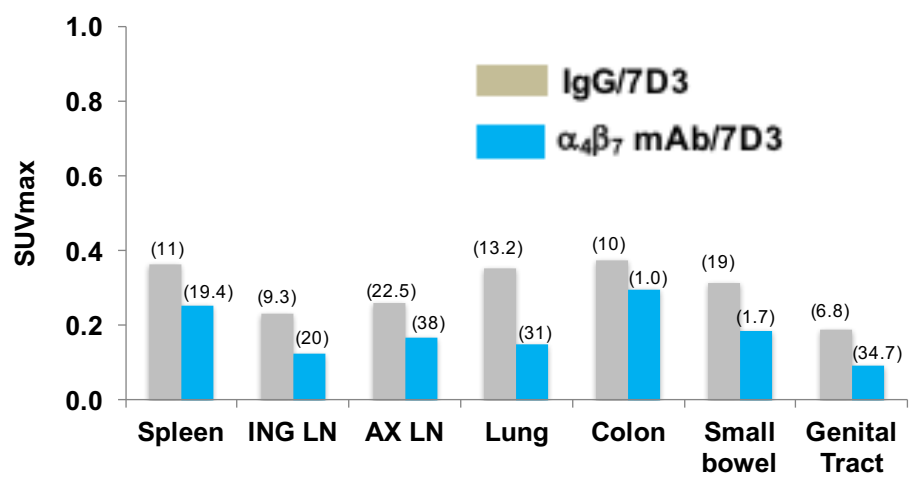

Week 2

# Supplementary Figure 5

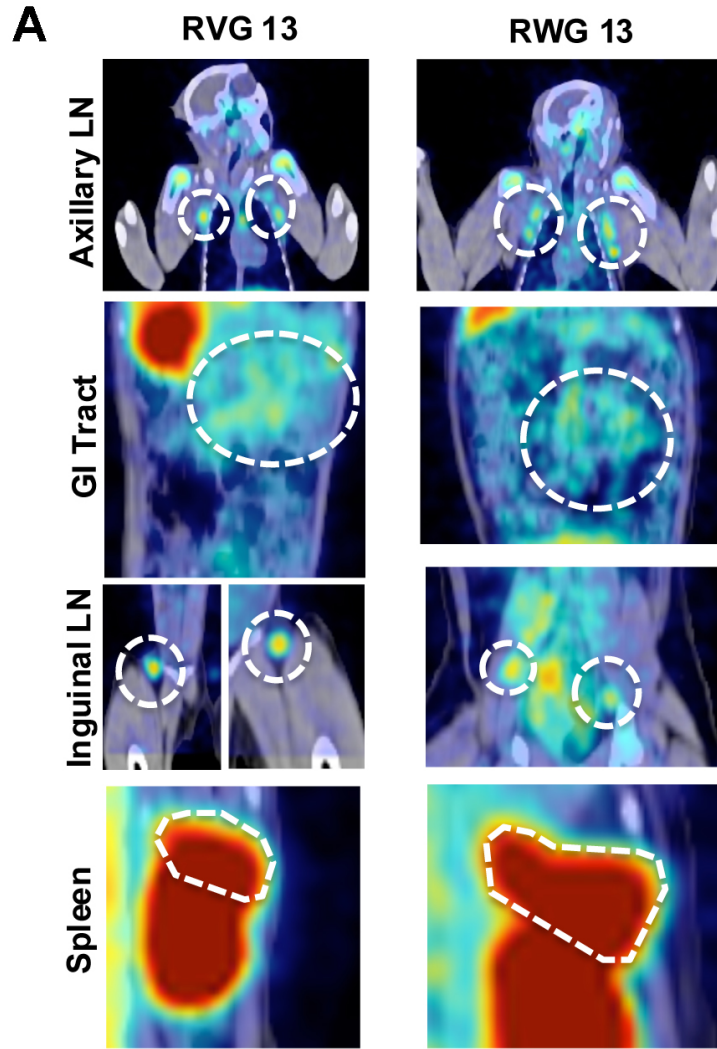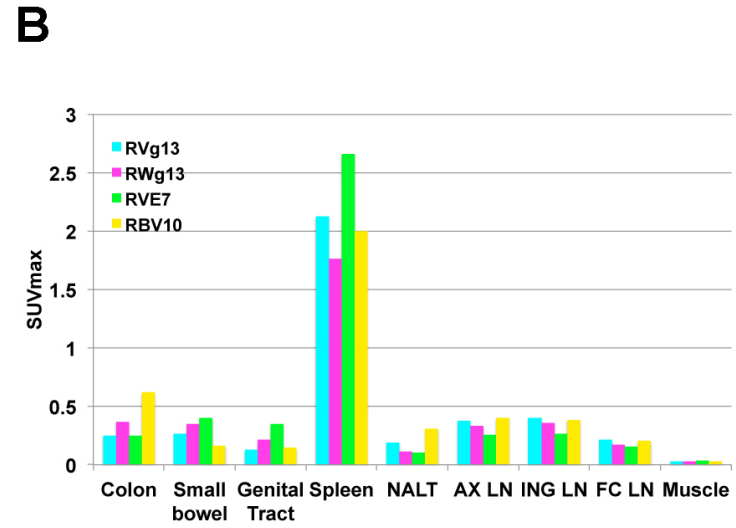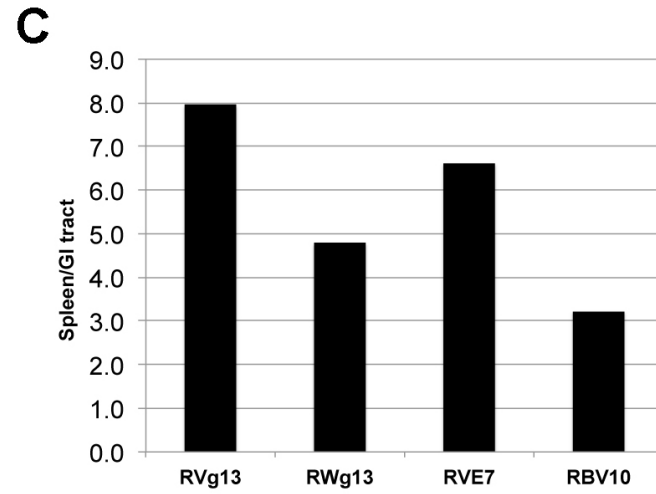

# Supplementary Figure 6

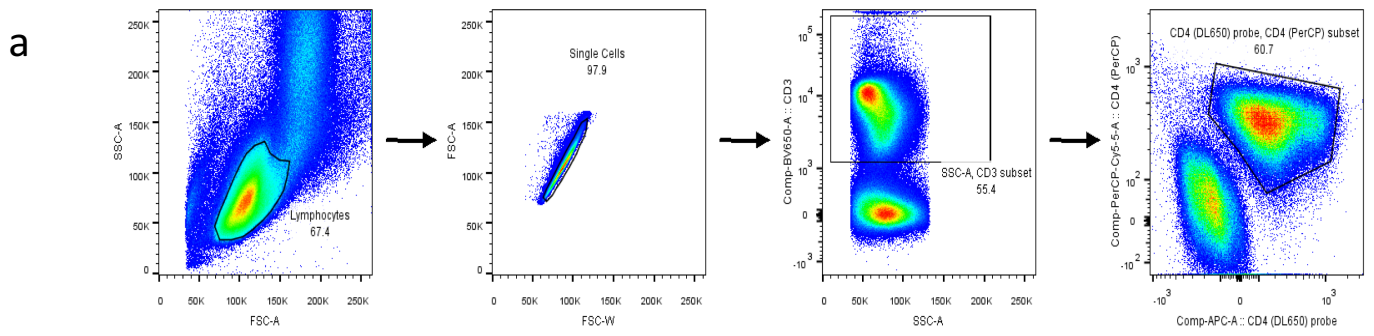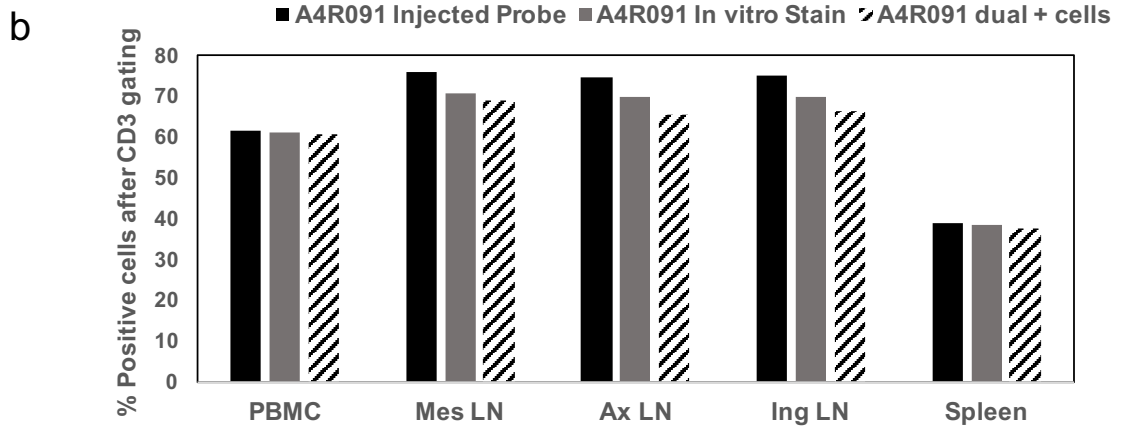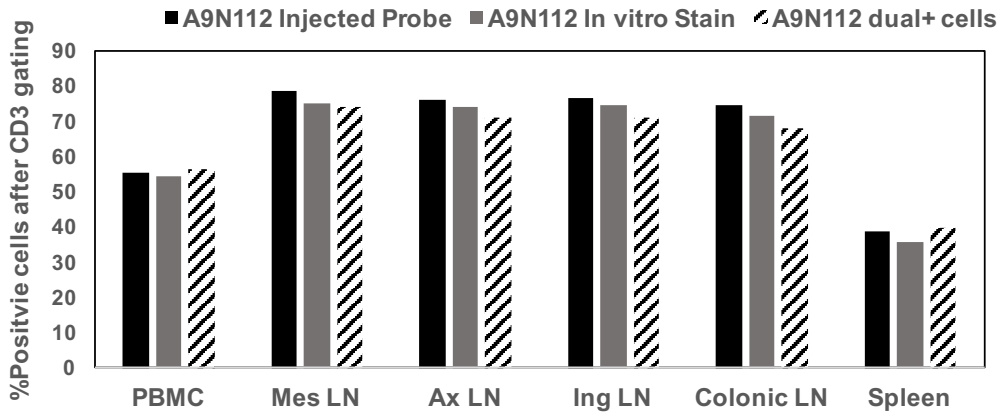

**c**

| Animal ID                                          | Tissue | Weight (g) | Probe+ cells/g of tissue | Probe+ cells | SUV total | cells/SUV | SNR=2       |
|----------------------------------------------------|--------|------------|--------------------------|--------------|-----------|-----------|-------------|
| A4R091                                             | Spleen | 7          | 9.86E+07                 | 6.90E+08     | 9857      | 7.00E+04  | 3500        |
| A9N112                                             | Spleen | 7          | 8.82E+07                 | 6.18E+08     | 9576      | 6.45E+04  | 3225        |
| <b>Minimum number of cells detected with SNR=2</b> |        |            |                          |              |           |           | <b>3363</b> |

# Supplementary Figure 7

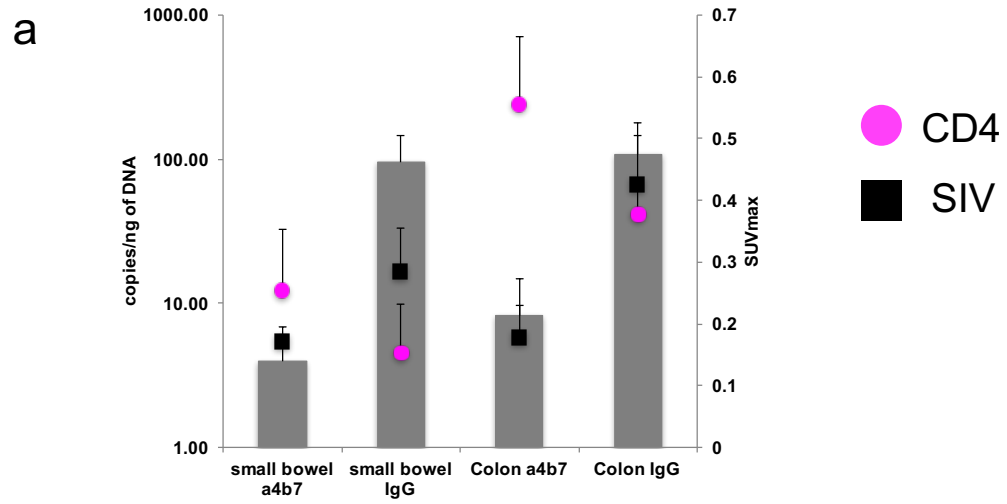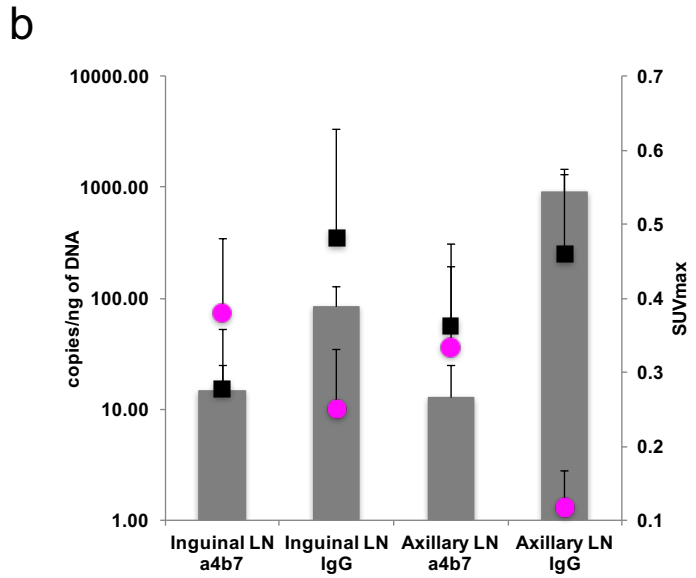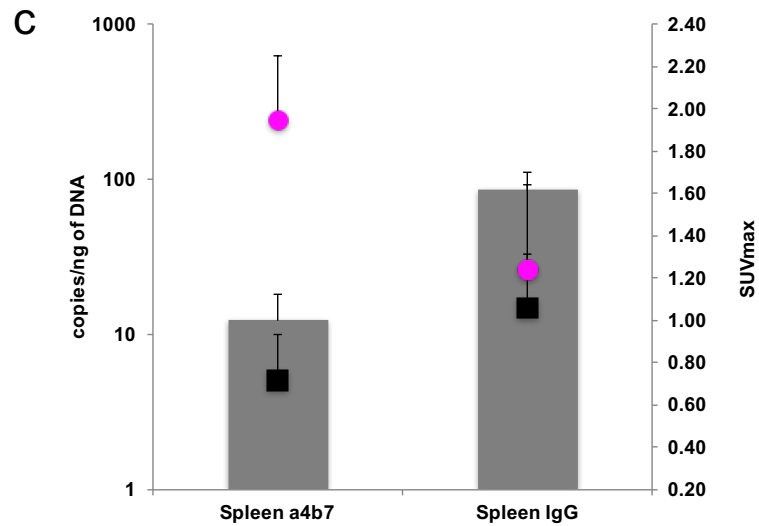



## Supplementary Table 1. Animal, infection status and treatment descriptions at the time of imaging and blood CD4 counts

| Animal name        | Sex | Infection Route | Peak Viral Loads (copies/mL) | Imaging target | Probe                                  | Imaging time after infection Weeks | IgG treated | α4β7 treated | Blood CD4 counts/μl |
|--------------------|-----|-----------------|------------------------------|----------------|----------------------------------------|------------------------------------|-------------|--------------|---------------------|
| <b>Acute</b>       |     |                 |                              |                |                                        |                                    |             |              |                     |
| RPJ15              | M   | i.r.            | 8,112,781                    | SIV env        | Modified 7D3 mAb                       | 2&3                                | -           | +            | 1386                |
| RQJ15              | M   | i.r.            | 1,817,007                    | SIV env        | Modified 7D3 mAb                       | 2&3                                | -           | +            | 2064                |
| RPg15              | M   | i.r.            | 9,515,745                    | SIV env        | Modified 7D3 mAb                       | 2&3                                | +           | -            | 1659                |
| RSq14              | M   | i.r             | 25,448,804                   | SIV env        | Modified 7D3 mAb                       | 2&3                                | +           | -            | 2120                |
| RUp14              | F   | i.r.            | 4,892,795                    | CD4            | F(ab') <sub>2</sub> derived from CD4R1 | 2&5                                | +           | -            | 845                 |
| RVo14              | F   | i.r.            | 20,930,170                   | CD4            | F(ab') <sub>2</sub> derived from CD4R1 | 2&5                                | +           | -            | 803                 |
| ROe15              | F   | i.r.            | 43,130,899                   | CD4            | F(ab') <sub>2</sub> derived from CD4R1 | 2&5                                | -           | +            | 1042                |
| ROr14              | F   | i.r.            | 3,973,501                    | CD4            | F(ab') <sub>2</sub> derived from CD4R1 | 2&5                                | -           | +            | 641                 |
| <b>Chronic</b>     |     |                 |                              |                |                                        |                                    |             |              |                     |
| RDg11              | F   | IVAG            | 7,926,573                    | SIV env        | Modified 7D3 mAb                       | 24                                 | -           | +            | 1224                |
| RCw11              | F   | IVAG            | 257,966                      | SIV env        | Modified 7D3 mAb                       | 20                                 | -           | +            | 860                 |
| RLc12              | F   | IVAG            | 3,403,352                    | SIV env        | Modified 7D3 mAb                       | 20                                 | +           | -            | 480                 |
| RRn11              | F   | IVAG            | 401,692                      | SIV env        | Modified 7D3 mAb                       | 24                                 | +           | -            | 398                 |
| RUT13              | M   | IV              | 2,640,000                    | SIVenv         | Modified 7D3 mAb                       | 13                                 | -           | -            | NA                  |
| RZB9               | F   | IV              | 579,000                      | CD4            | F(ab') <sub>2</sub> derived from CD4R1 | 73                                 | -           | -            | 190                 |
| RTI12              | F   | IV              | 131,000                      | CD4            | F(ab') <sub>2</sub> derived from CD4R1 | 73                                 | -           | -            | 179                 |
| <b>ART+ α4β7</b>   |     |                 |                              |                |                                        |                                    |             |              |                     |
| ROq14              | F   | IV              | 936,191                      | SIV env/CD4    | Modified 7D3 mAb/CD4R1                 | 16/22/23                           | -           | +            | 1628                |
| Rlv 14             | F   | IV              | 3,252,220                    | SIV env/CD4    | Modified 7D3 mAb/CD4R1                 | 16/22/23                           | -           | +            | 3312                |
| RLo14              | F   | IV              | 3,835,684                    | SIV env/CD4    | Modified 7D3 mAb/CD4R1                 | 16/22/23                           | +           | -            | 944                 |
| RU <sub>s</sub> 14 | F   | IV              | 10,950,452                   | SIV env/CD4    | Modified 7D3 mAb/CD4R1                 | 16/22/23                           | +           | -            | 944                 |
| <b>Uninfected</b>  |     |                 |                              |                |                                        |                                    |             |              |                     |
| RHg7               | M   | NA              | NA                           | SIV            | Modified 7D3 mAb                       | NA                                 | -           | -            | 1382                |
| RVe7               | M   | NA              | NA                           | SIV            | Modified 7D3 mAb                       | NA                                 | -           | -            | 501                 |
| RVe7               | M   | NA              | NA                           | CD4            | F(ab') <sub>2</sub> derived from CD4R1 | NA                                 | -           | -            | 501                 |
| RVg13              | F   | NA              | NA                           | CD4            | F(ab') <sub>2</sub> derived from CD4R1 | NA                                 | -           | -            | 1702                |
| RWg13              | F   | NA              | NA                           | CD4            | F(ab') <sub>2</sub> derived from CD4R1 | NA                                 | -           | -            | 501                 |
| RBv10              | M   | NA              | NA                           | CD4            | F(ab') <sub>2</sub> derived from CD4R1 | NA                                 | -           | -            | 1009                |
| ROv15              | F   | NA              | NA                           | CD4            | F(ab') <sub>2</sub> derived from CD4R1 | NA                                 | -           | +            | 2204                |
| RPf16              | M   | NA              | NA                           | CD4            | F(ab') <sub>2</sub> derived from CD4R1 | NA                                 | -           | +            | 525                 |
| ROa16              | M   | NA              | NA                           | CD4            | F(ab') <sub>2</sub> derived from CD4R1 | NA                                 | -           | +            | 1318                |
| RZq15              | F   | NA              | NA                           | CD4            | F(ab') <sub>2</sub> derived from CD4R1 | NA                                 | -           | +            | 1262                |

Note: ROv15, RPF16, ROa16, and RZq15 were imaged for CD4 before and during α4β7 treatment.

**Supplementary Table 2.** Immuno-PET anti-gp120 SUVmax data from the animals imaged ( $\alpha_4\beta_7$  mAb or IgG) during an acute infection.

| 2 weeks PI                       |        | SUV max values |             |               |        |       |       |        |       |        |       |
|----------------------------------|--------|----------------|-------------|---------------|--------|-------|-------|--------|-------|--------|-------|
| Treatment and Ligand             | Animal | Colon          | Small bowel | Genital Tract | Spleen | NALT  | AX LN | ING LN | FC LN | Muscle | Lung  |
| IgG anti-gp120                   | RPG15  | 0.347          | 0.271       | 0.178         | 0.334  | 0.413 | 0.302 | 0.247  | 0.298 | 0.055  | 0.321 |
| IgG anti-gp120                   | RSQ14  | 0.400          | 0.355       | 0.196         | 0.390  | 0.337 | 0.219 | 0.217  | 0.240 | 0.055  | 0.387 |
| $\alpha_4\beta_7$ mAb anti-gp120 | RPJ15  | 0.298          | 0.188       | 0.116         | 0.287  | 0.230 | 0.214 | 0.143  | 0.200 | 0.054  | 0.180 |
| $\alpha_4\beta_7$ mAb anti-gp121 | RQL15  | 0.293          | 0.184       | 0.070         | 0.218  | 0.185 | 0.122 | 0.106  | 0.151 | 0.054  | 0.115 |
|                                  |        |                |             |               |        |       |       |        |       |        |       |
| 3 weeks PI                       |        | SUV max values |             |               |        |       |       |        |       |        |       |
| Treatment and Ligand             | Animal | Colon          | Small bowel | Genital Tract | Spleen | NALT  | AX LN | ING LN | FC LN | Muscle | Lung  |
| IgG anti-gp120                   | RPG15  | 0.488          | 0.473       | 0.420         | 0.817  | 0.673 | 0.470 | 0.428  | 0.470 | 0.058  | 0.488 |
| IgG anti-gp120                   | RSQ14  | 0.431          | 0.316       | 0.070         | 0.855  | 0.200 | 0.166 | 0.154  | 0.154 | 0.055  | 0.280 |
| $\alpha_4\beta_7$ mAb anti-gp120 | RPJ15  | 0.234          | 0.181       | 0.293         | 0.396  | 0.338 | 0.162 | 0.167  | 0.184 | 0.056  | 0.260 |
| $\alpha_4\beta_7$ mAb anti-gp120 | RQL15  | 0.248          | 0.266       | 0.187         | 0.441  | 0.247 | 0.188 | 0.136  | 0.159 | 0.055  | 0.250 |

**Supplementary Table 3.** Immuno-PET anti-gp120 SUVmean data at 2 weeks post-infection ( $\alpha_4\beta_7$  mAb or IgG), from two different axial cross-sections within the animals imaged.

| Treatment and Ligand             | Animal | SUVmean |       |            |
|----------------------------------|--------|---------|-------|------------|
|                                  |        | Upper   | Lower | Average GI |
| IgG anti-gp120                   | RPG15  | 0.187   | 0.135 | 0.161      |
| IgG anti-gp120                   | RSQ14  | 0.195   | 0.166 | 0.181      |
| $\alpha_4\beta_7$ mAb anti-gp120 | RPJ15  | 0.150   | 0.100 | 0.125      |
| $\alpha_4\beta_7$ mAb anti-gp120 | RQL15  | 0.120   | 0.060 | 0.090      |

**Supplementary Table 4.** Immuno-PET anti-gp120 SUVmax data from the 4 chronically infected animals, treated with  $\alpha_4\beta_7$  mAb or IgG.

|                                | SUVmax |        |       |        |       |       |
|--------------------------------|--------|--------|-------|--------|-------|-------|
|                                | NALT   | Spleen | Ax LN | Ing LN | Lungs | GI    |
| RLC12 (IgG)                    | 1.327  | 1.593  | 0.523 | 0.881  | 0.731 | 1.368 |
| RDG11 ( $\alpha_4\beta_7$ mAb) | 0.944  | 1.198  | 0.493 | 0.380  | 0.591 | 0.728 |
| RRN11(IgG)                     | 1.095  | 1.407  | 0.734 | 0.522  | 1.079 | 0.913 |
| RCW11 ( $\alpha_4\beta_7$ mAb) | 0.945  | 0.976  | 0.609 | 0.451  | 0.536 | 0.523 |

**Supplementary Table 5.** Immuno-PET anti-gp120 SUVMean data from the GIT of 4 chronically infected animals, treated with  $\alpha_4\beta_7$  mAb or IgG.

|                                | SUVmean |             |
|--------------------------------|---------|-------------|
|                                | colon   | small bowel |
| RLC12(IgG)                     | 0.57    | 0.26        |
| RRN11(IgG)                     | 0.35    | 0.20        |
| RCW11 ( $\alpha_4\beta_7$ mAb) | 0.10    | 0.20        |
| RDG11( $\alpha_4\beta_7$ mAb)  | 0.10    | 0.29        |

**Supplementary Figure 1. Schematic of experimental design for PET/CT measurements during the acute, early-chronic and dual therapy cohorts.**

Schematics of:  $\alpha_4\beta_7$  mAb treatment, and imaging acquisition in the acute infection cohort.  $\alpha_4\beta_7$  mAb treatment, and imaging acquisition in the early-chronic infection cohort.  $\alpha_4\beta_7$  mAb and ART treatment, and imaging acquisition in the dual-therapy cohort. Detailed descriptions of the experimental protocols can be found in Ansari et. al. 2011, Byrareddy et.al. 2014, and Byrareddy et.al. 2016.

**Supplementary Figure 2. CT and PET/CT fusion images of a chronically infected (SIV) macaque probed with an anti-gp120 mAb.**

CT images (left) and PET/CT fusion images of an SIV infected macaque (RID9) probed with  $^{64}\text{Cu}$ /DOTA labeled, PEG conjugated SIV gp120 mAb clone 7D3. Organs and tissues of interest are labelled for reference.

**Supplementary Figure 3. Immuno PET image comparison of an infected vs. uninfected macaque of a chronically infected (SIV) macaque probed with an anti-gp120 mAb.**

Immuno-PET assisted frontal image analysis of a chronically SIV infected animal (RUT13)(left) and an uninfected animal (RVE7)(right) 36 hrs. post administration of  $^{64}\text{Cu}$  labeled anti-SIVgp120 monoclonal antibody (clone 7D3). Background signals in the uninfected animal appear primarily in heart and liver.

**Supplementary Figure 4. Tissue specific localization of gp120 in  $\alpha_4\beta_7$  mAb-treated, acutely infected macaques by immuno-PET/CT image analysis.**

Anti-gp120 immuno-PET/CT images from two macaques pretreated with  $\alpha_4\beta_7$  mAb (RQ115, RPj15) and two animals pretreated with control IgG (RSq14, RPg15) at week 2. The average SUVmax for the spleen, inguinal lymph-nodes (ING LN), axillary lymph-nodes (AX LN), lung, colon, small bowel, and genital tract were determined for control IgG treated (grey) and  $\alpha_4\beta_7$  mAb treated macaques (blue). Median coefficient of variation (CV) indicated in parenthesis in panels.

**Supplementary Figure 5. Immuno-PET/CT images of CD4<sup>+</sup> cells in uninfected macaques.**

Four uninfected animals were subjected to immuno-PET/CT image analysis following administration of  $^{64}\text{Cu}$ -labeled F(ab')<sub>2</sub> fragment from anti CD4 clone OKT-4A. (a) Representative images from two macaques (RVg13 and RWg13), with separate panels displaying axillary LNs, GI tract, Inguinal LNs, and spleen (each highlighted by a white broken line). (b) SUVmax values from RVg13, RWg13 along with 2 additional animals, RVE7 and RBv10, for the colon, small bowel, genital tract, spleen, nasal associated lymphoid tissues (NALT), axillary lymph-node (AX LN), inguinal lymph-node (AX LN) facio-cranial lymph-nodes (FC LN) and for background, muscle. (c) The ratio of the maximum signal in the spleen to the maximum signal in the GI tract is shown for each of the 4 animals.

**Supplementary Figure 6. Specificity and sensitivity of the Immuno-PET CD4 probe.**

(a) Gating strategy for dual labeled CD4 cells. CD4 staining in panel 4 (right), in vivo stain with  $^{64}\text{Cu}$ /Dylight 650 labeled anti-CD4 F(ab')<sub>2</sub> OKT4 (x-axis), in vitro stain with PerCP anti CD4 L200 (y-axis). (b) The specificity of the probe was determined by using a combination of  $^{64}\text{Cu}$  and Dylight 650 labeled anti-CD4 F(ab')<sub>2</sub> probes in two non-infected animals. Post PET/CT

imaging, the cells were isolated, and subsequently labeled with a second (different epitope) anti-CD4 antibody and a CD3 antibody. The number of CD4<sup>+</sup> cells after CD3 gating for both the in vivo PET/fluorescent probe and the second anti-CD4 antibody were measured and plotted, as well as the cell population percentage that was double positive for both antibodies. (c) Sensitivity of in vivo detection for spleen was estimated. The number of probe positive cells per gram of tissue, the mass of the spleen measured and the number of probe positive cells is shown. From PET images, the total SUV within the spleen was measured and the number of cells per SUV is provided. Using a signal to noise ratio (SNR) of 0.05 (2X the background) the minimum number of cell detected is shown.

**Supplementary Figure 7. Comparison of Immuno-PET derived SIV and CD4<sup>+</sup> cell imaging data with levels of pro-viral DNA.** PCR measurements of pro-viral DNA levels (included in Fig. 1) compared with the SUV values from PET derived measurements of SIV (n=4) and CD4 cells (n=6). DNA measurements were pooled from both acute and early-chronic  $\alpha_4\beta_7$  cohorts. SUV measurements were pooled for both SIV gp120 and CD4. Bar graphs represent pro-viral DNA levels (# copies/ng DNA), the black squares represent the mean +/- SD of the SUVmax data for SIV and the magenta circles represent the mean +/- SD of the SUVmax data for SIV levels. (a) small bowel and colon tissues (b) inguinal and axillary lymph-nodes and (c) spleen. Mean +/- SD are indicated.
